# Supplementary material for: Delta Opioid Receptor Signaling Promotes Resilience to Stress Under the Repeated Social Defeat Paradigm in Mice
Source: PubMed Central journal article supplement (PMC5897549; doi:10.3389/fnmol.2018.00100), 2018-04-06
Supplement: Table_1.pdf [file Table_1.pdf]

| Bregma Levels in Hippocampus            | Regions | Layers           | Control      | Resilient    | Vulnerable   | p values      |
|-----------------------------------------|---------|------------------|--------------|--------------|--------------|---------------|
| Dorsal Hippocampus (Bregma = -2.06 mm)  | CA1     | <i>Pyramidal</i> | 0.608        | 0.590        | 0.576        | 0.8179        |
|                                         |         | <i>Radiatum</i>  | 0.232        | 0.249        | 0.265        | 0.6941        |
|                                         |         | <i>Oriens</i>    | 0.323        | 0.283        | 0.326        | 0.642         |
|                                         | CA3     | <i>Pyramidal</i> | 0.513        | 0.467        | 0.498        | 0.7778        |
|                                         |         | <i>Radiatum</i>  | 0.215        | 0.230        | 0.230        | 0.42          |
|                                         |         | <i>Oriens</i>    | 0.270        | 0.259        | 0.248        | 0.9277        |
| Central Hippocampus (Bregma = -2.70 mm) | CA1     | <i>Pyramidal</i> | 0.491        | 0.492        | 0.495        | 0.8551        |
|                                         |         | <i>Radiatum</i>  | 0.196        | 0.217        | 0.207        | 0.752         |
|                                         |         | <i>Oriens</i>    | 0.260        | 0.256        | 0.274        | 0.8788        |
|                                         | CA3     | <i>Pyramidal</i> | 0.561        | 0.542        | 0.568        | 0.8637        |
|                                         |         | <i>Radiatum</i>  | 0.224        | 0.233        | 0.249        | 0.6991        |
|                                         |         | <i>Oriens</i>    | 0.235        | 0.247        | 0.276        | 0.157         |
| Ventral Hippocampus (Bregma = -2.92 mm) | CA1     | <i>Pyramidal</i> | 0.464        | 0.484        | 0.458        | 0.7607        |
|                                         |         | <i>Radiatum</i>  | 0.194        | 0.219        | 0.223        | 0.5551        |
|                                         |         | <i>Oriens</i>    | <b>0.271</b> | <b>0.275</b> | <b>0.169</b> | <b>0.0022</b> |
|                                         | CA3     | <i>Pyramidal</i> | 0.502        | 0.534        | 0.515        | 0.7921        |
|                                         |         | <i>Radiatum</i>  | 0.224        | 0.248        | 0.240        | 0.6897        |
|                                         |         | <i>Oriens</i>    | 0.219        | 0.248        | 0.249        | 0.3355        |
|                                         | SUBv    | <i>Subiculum</i> | 0.368        | 0.467        | 0.406        | 0.1962        |
